# Supplementary material for: Electrodeposition of amorphous WO3on SnO2–TiO2inverse opal nano-framework for highly transparent, effective and stable electrochromic smart window
Source: Royal Society of Chemistry journal article supplement (doi:10.1039/c9ra03084k), 2019-01-01
Supplement: c9ra03084k1.pdf [file c9ra03084k1.pdf]

## Supplementary Information

### **Electrodeposition of amorphous WO<sub>3</sub> on SnO<sub>2</sub>-TiO<sub>2</sub> inverse opal nano- framework for highly transparent, effective and stable electrochromic smart window**

*Tam Duy Nguyen*<sup>a,b,\*</sup>, *Loo Pin Yeo*<sup>a,b</sup>, *Daniel Mandler*<sup>b,c</sup>, *Shlomo Magdassi*<sup>b,c</sup>, *Alfred Iing  
Yoong Tok*<sup>a,b,\*</sup>

<sup>a</sup>School of Materials Science and Engineering, Nanyang Technological University, 50  
Nanyang Avenue, Singapore 639798

<sup>b</sup>Singapore-HUJ Alliance for Research and Enterprise, NEW-CREATE Phase II, Campus for  
Research Excellence and Technological Enterprise (CREATE), Singapore 138602

<sup>c</sup>Institute of Chemistry, the Hebrew University of Jerusalem, Jerusalem 9190401, Israel

\*E-mail: tamnguyen@ntu.edu.sg / MIYTok@ntu.edu.sg

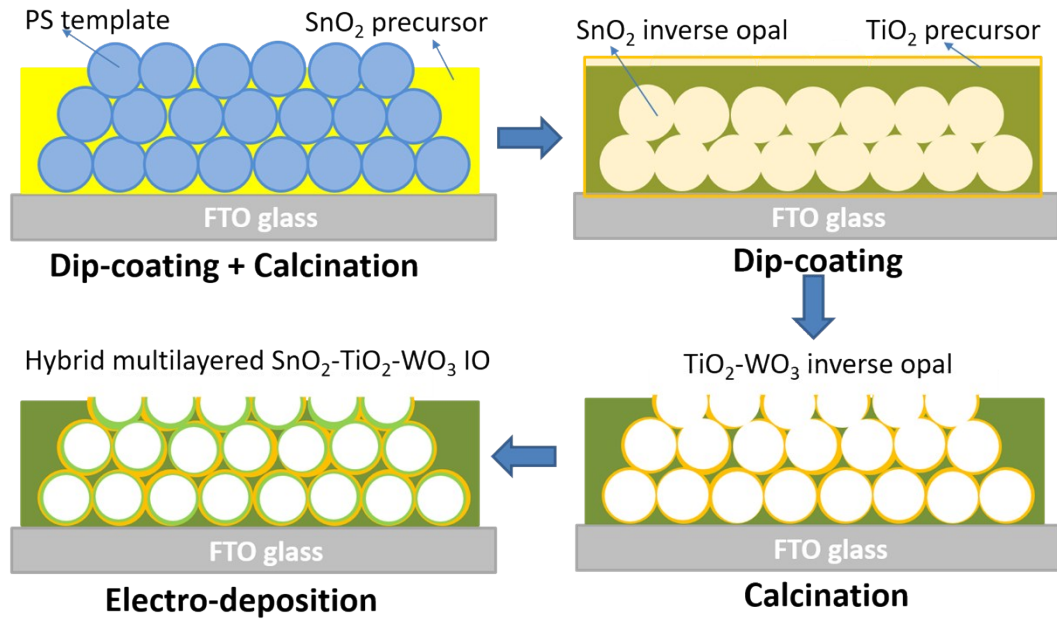

**Figure S1:** The synthesis procedure of hybrid multilayered SnO<sub>2</sub>-TiO<sub>2</sub>-WO<sub>3</sub> inverse opal nanostructure.

The hybrid multilayered SnO<sub>2</sub>-TiO<sub>2</sub>-WO<sub>3</sub> inverse opal nanostructure was fabricated onto a 1.5 x 2.5 cm<sup>2</sup> commercial FTO glass. The as-received FTO glass was pre-treated by a cleaning procedure using methanol, acetone and ethanol, and finally kept in the mixed solution of ethanol and DI water before sample fabrication. The PS spheres were dispersed in DI water solvent with the concentration of 0.02 wt.%. For each fabrication, three pieces of pre-cleaning FTO glass were immersed in 100 mL of PS dispersion solution.

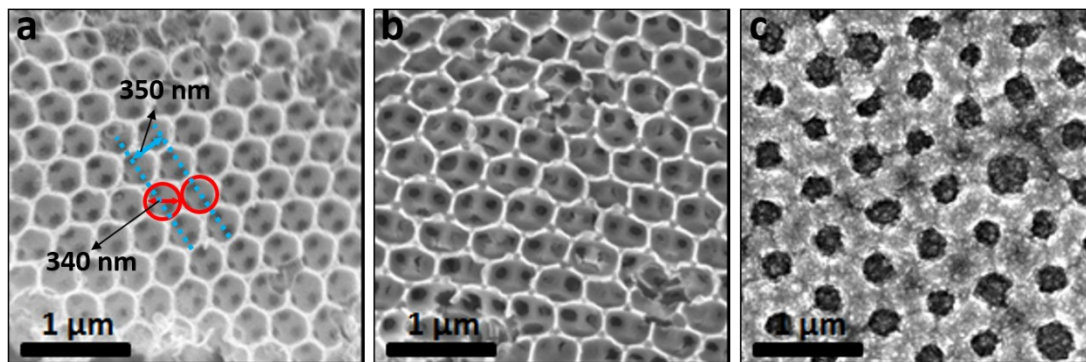

**Figure S2:** FESEM images of SnO<sub>2</sub> IO (a), SnO<sub>2</sub>-TiO<sub>2</sub> (b) and hybrid multilayered SnO<sub>2</sub>-TiO<sub>2</sub>-WO<sub>3</sub> IO nanostructure (c) with initial pore-size of 520 nm and electro-deposition duration of 200 seconds. All images were acquired under the same magnification.

Figure S2 shows the FESEM images of SnO<sub>2</sub>, SnO<sub>2</sub>-TiO<sub>2</sub>, and hybrid multilayered SnO<sub>2</sub>-TiO<sub>2</sub>-WO<sub>3</sub> IO nanostructure obtained from the PS solution with initial pore-size of 520 nm. The diameter of the SnO<sub>2</sub> IO pores is about 340 nm, which is smaller than that of the initial PS opal diameter (520 nm). The distance between two adjacent pores is measured to be approximately 350 nm. With the coating of a thin layer of TiO<sub>2</sub>, there is no significant change in the morphology of the double-layered SnO<sub>2</sub>-TiO<sub>2</sub> IO framework (Figure S2b). However, following WO<sub>3</sub> electrodeposition, a uniformly deposited WO<sub>3</sub> layer can be clearly observed on the surface of the double-layered SnO<sub>2</sub>-TiO<sub>2</sub> IO framework (Figures S2c), forming a hybrid multilayered SnO<sub>2</sub>-TiO<sub>2</sub>-WO<sub>3</sub> IO nanostructure.

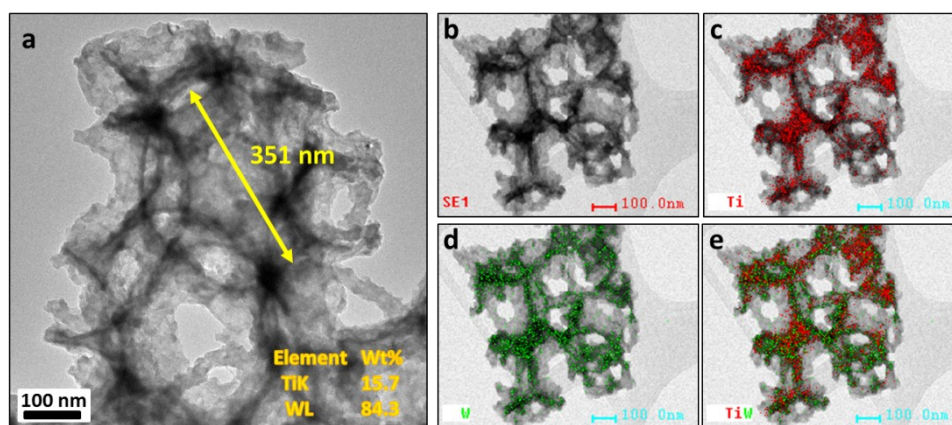

**Figure S3:** STEM images coupled with EDX mapping of hybrid multilayered SnO<sub>2</sub>-TiO<sub>2</sub>-WO<sub>3</sub> IO nanostructure obtained from the PS solution with initial pore-size of 392 nm.

Figure S3 indicates the STEM image coupled with EDX mapping of TiO<sub>2</sub>-WO<sub>3</sub> IO nanostructure. It is obvious that the inner SnO<sub>2</sub> framework is surrounded by a layer of amorphous WO<sub>3</sub>. By EDX analysis, the bulk elemental composition of TiO<sub>2</sub>-WO<sub>3</sub> IO is measured to be 15.7 and 84.3 at.% for Ti and W, respectively.

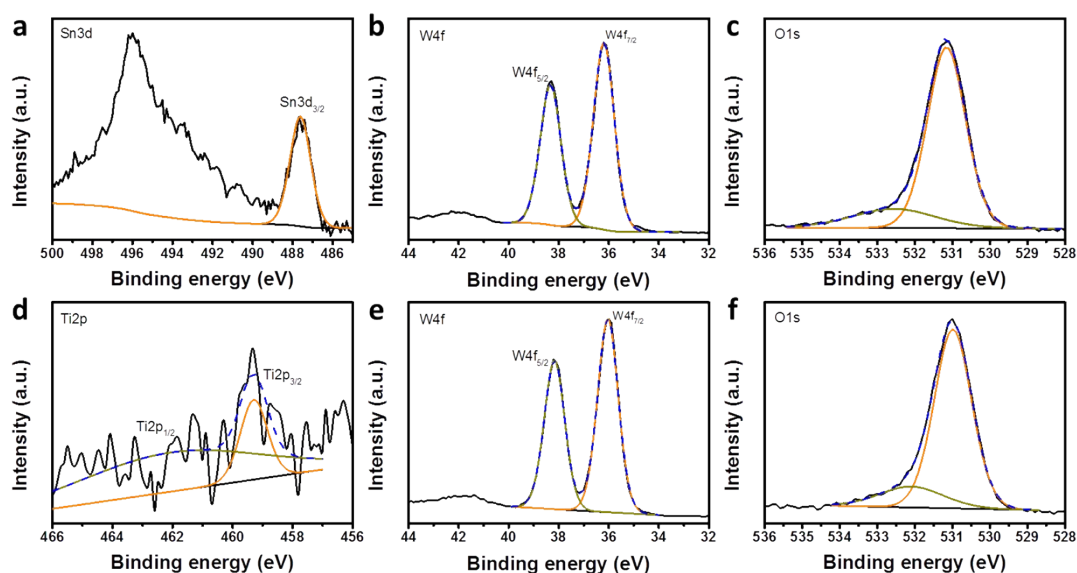

**Figure S4:** The fine XPS spectra of SnO<sub>2</sub>-WO<sub>3</sub> (a-c) and TiO<sub>2</sub>-WO<sub>3</sub> (d-f) IO nanostructures.

Figure S4 presents the fine scan XPS spectra of Sn3d, W4f, O1s components for SnO<sub>2</sub>-WO<sub>3</sub> and Ti2p, W4f, O1s for TiO<sub>2</sub>-WO<sub>3</sub> IO nanostructures. By curve-fitting analysis,

the O1s spectrum of both SnO<sub>2</sub>-WO<sub>3</sub> and TiO<sub>2</sub>-WO<sub>3</sub> IO is located in the metal oxide binding energy range (~530.8 eV). The W4f spectrum is located at the binding energy of approximately 36.0 eV, confirming the WO<sub>3</sub> chemical state, with well separated spin-orbit components ( $\Delta_{\text{metal}}=2.17$  eV). The Sn3d and Ti2p spectra also confirms the SnO<sub>2</sub> (~486.6 eV) and TiO<sub>2</sub> chemical state (~459.1 eV), respectively.
